# Supplementary material for: Crystal Structure of Escherichia coli originated MCR-1, a phosphoethanolamine transferase for Colistin Resistance
Source: PubMed Central journal article supplement (PMC5153839; doi:10.1038/srep38793), 2016-12-13
Supplement: srep38793-s1.pdf [file srep38793-s1.pdf]

1 **Supplementary materials**

2 **Crystal Structure of Escherichia coli originated MCR-1, a phosphoethanolamine**  
3 **transferase for Colistin Resistance**

4  
5 Menglong Hu<sup>a#</sup>, Jiubiao Guo<sup>b,c#</sup>, Qipeng Cheng<sup>b,c</sup>, Zhiqiang Yang<sup>b,c</sup>, Edward Wai Chi  
6 Chan<sup>b,c</sup>, Sheng Chen<sup>b,c\*</sup>, Quan Hao<sup>a\*</sup>

7 <sup>a</sup> School of Biomedical Sciences, University of Hong Kong , Laboratory Block, 21  
8 Sassoon Road, Pokfulam, Hong Kong, China;

9 <sup>b</sup>Shenzhen Key lab for Food Biological Safety Control, Food Safety and Technology  
10 Research Center, Hong Kong PolyU Shen Zhen Research Institute, Shenzhen, P. R.  
11 China;

12 <sup>c</sup>State Key Lab of Chirosciences, Department of Applied Biology and Chemical  
13 Technology, The Hong Kong Polytechnic University, Hung Hom, Kowloon, Hong  
14 Kong;

15

16 # These authors contributed equally.

17

18 \* To whom correspondence may be addressed: E-mail:qhao@hku.hk or  
19 sheng.chen@polyu.edu.hk.

20

21 **Supplementary Table 1. Crystallographic Data and Refinement Statistics**

| <b>Data Collection</b>                                                    |                                               |
|---------------------------------------------------------------------------|-----------------------------------------------|
|                                                                           | MCR-1-ED                                      |
| Cell dimensions<br>a, b, c (Å)<br>$\alpha, \beta, \gamma$ (°)             | 54.4, 55.8, 219.4<br>90, 90, 90               |
| Space group                                                               | P2 <sub>1</sub> 2 <sub>1</sub> 2 <sub>1</sub> |
| Wavelength (Å)                                                            | 0.9790                                        |
| Resolution (Å) <sup>a</sup>                                               | 50.00-2.33 (2.37- 2.33)                       |
| Unique reflections                                                        | 29251 (1160)                                  |
| Redundancy                                                                | 11.5 (9.8)                                    |
| $\langle I / \sigma I \rangle$                                            | 22.27 (2.84)                                  |
| R <sub>sym</sub>                                                          | 0.104(0.582)                                  |
| Completeness (%)                                                          | 97.5 (77.6)                                   |
| <b>Refinement</b>                                                         |                                               |
| R <sub>work</sub>                                                         | 0.186                                         |
| R <sub>free</sub>                                                         | 0.236                                         |
| RMSD from ideal<br>Bond lengths (Å)<br>Bond angles (°)                    | 0.009<br>1.184                                |
| Average B-factors (Å <sup>2</sup> )                                       | 35.5                                          |
| Ramachandran plot (%):<br>favored/allowed/outliers                        | 96.22/3.46/0.31                               |
| <sup>a</sup> Values in parentheses are from the highest-resolution shell. |                                               |

22  
23  
24  
25  
26  
27  
28  
29  
30  
31  
32  
33  
34  
35  
36

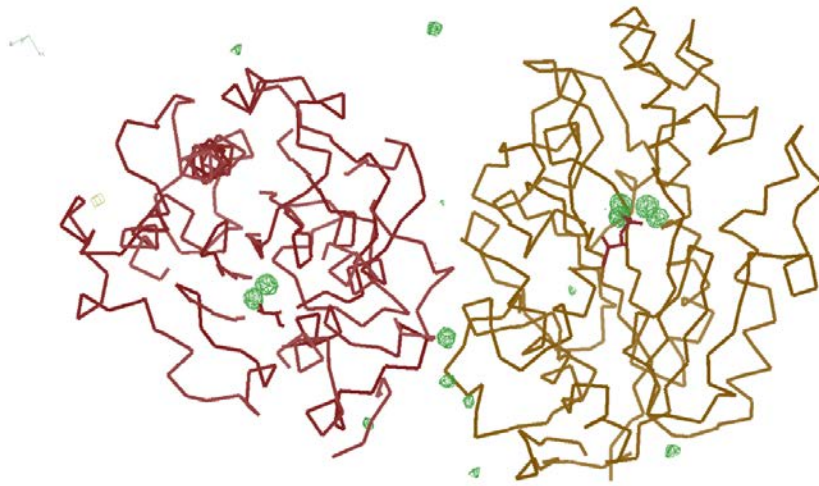

37

38 **Supplementary Figure 1. Phased anomalous difference map (5.0 r.m.s.d.)**

39

40

41

42

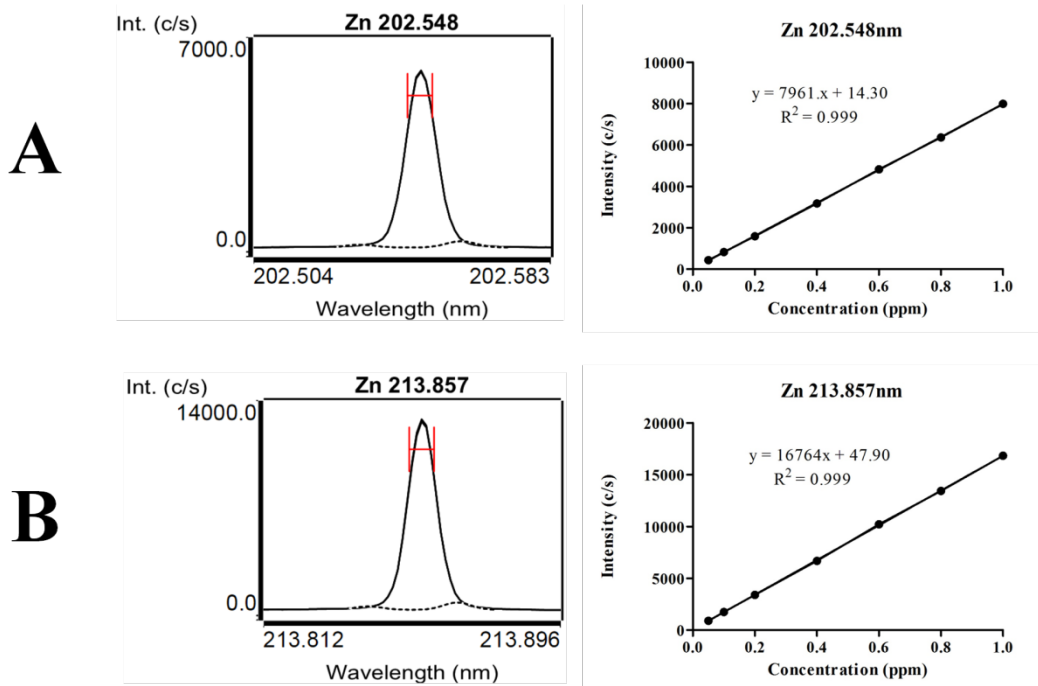

44

45

46 **Supplementary Figure 2. Metal content determination in MCR-1 protein.** The Zn  
 47 content measurement at the wavelength of 202.548nm (A) and 213.857nm (B). The  
 48 left panels show the Zn content in the MCR-1 protein sample, and the right panels  
 49 depict the corresponding Zn standard curves compiled for determining the Zn  
 50 concentration in the MCR-1 protein sample.

51

52

53

54

55

56

57

58

59

60

61

62

63

64

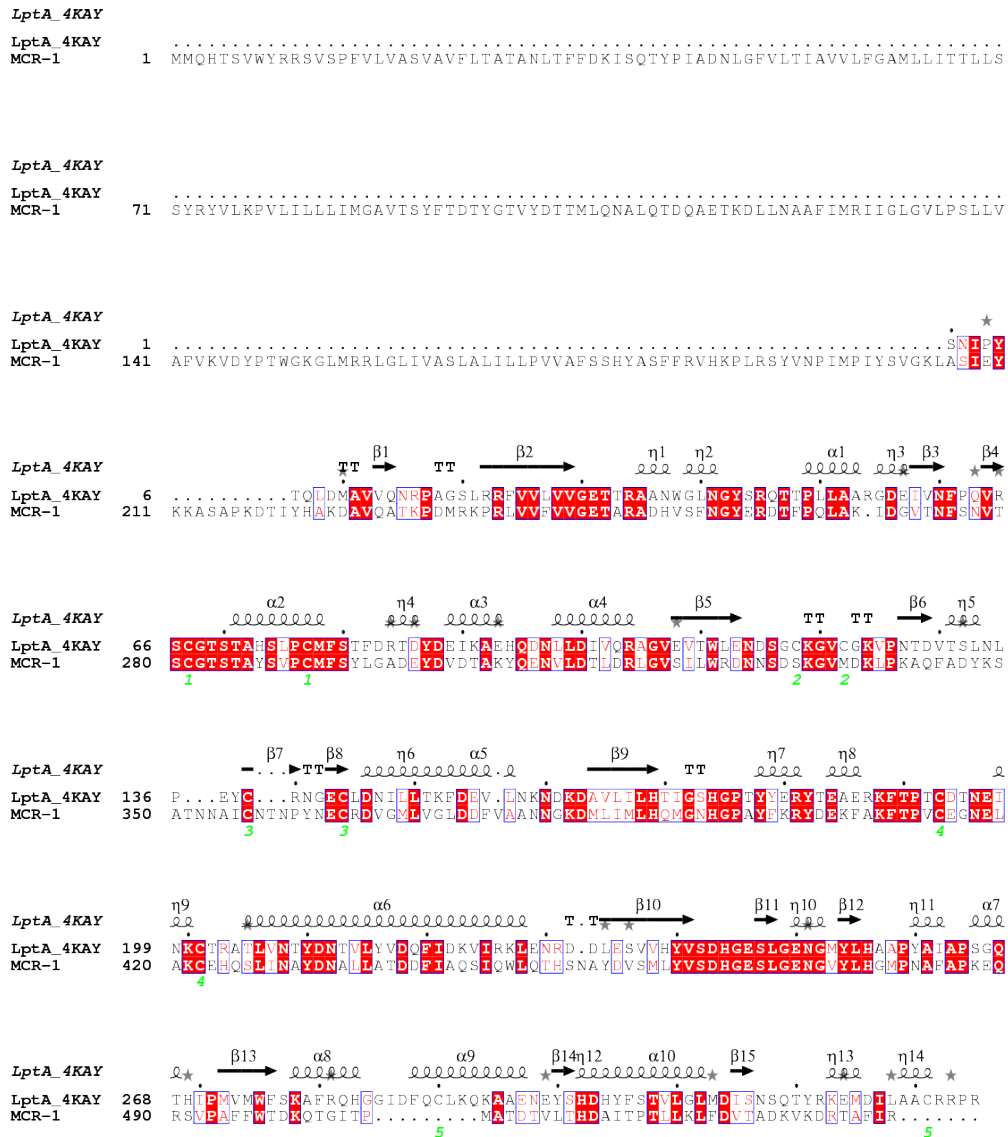

65

66 **Supplementary Figure 3.** Sequence alignment between MCR-1 (full length) and LptA (PDB code: 4KAY).  
67  
68

69

70

71

72

73

74

75

76

77

78

79

80

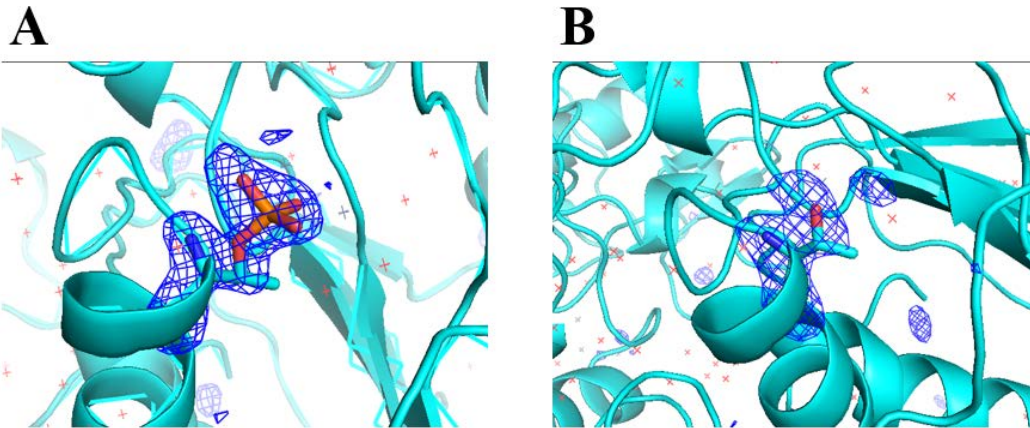

81

82 **Supplementary Figure 4.** The Omit-map density of the phosphorylation site at  
83 T285 of both chain A and B. (A) Phosphorylated T285 on chain A; (B) Non-  
84 phosphorylated T285 on chain B.

85

86

87

88

89

90

91

92

93

94

95

96

97

98

99

100

101

102

103

104

105

106

107

108

109

110

111

112

113

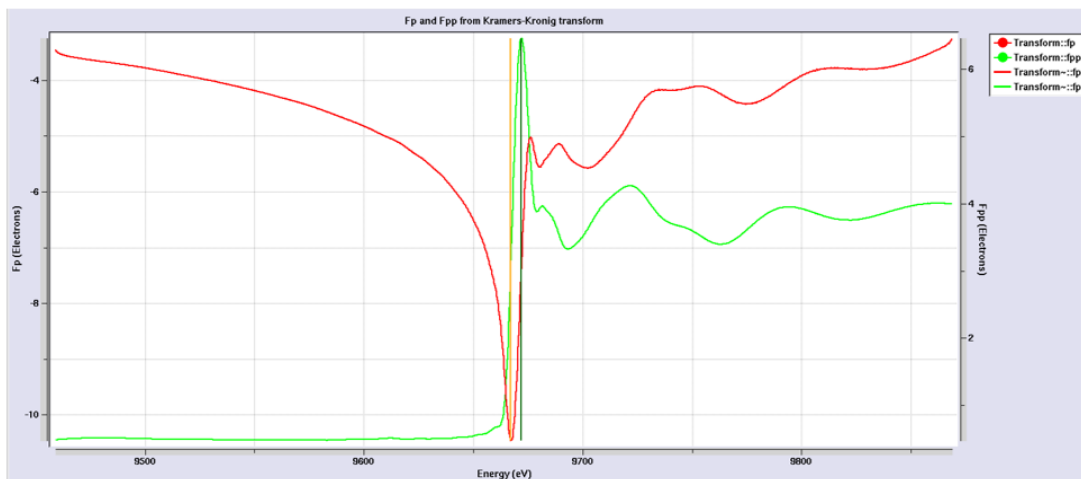

114

115 **Supplementary Figure 5.** Florescence scan of Zinc ions in crystals.

116
